# Supplementary material
Source: PubMed Central journal article supplement (PMC5399106)
Supplement: 10.1074_M116.764704_jbc.M116.764704-1.pdf [file 10.1074_M116.764704_jbc.M116.764704-1.pdf]

## Supplemental information

DNA breaks and chromatin structural changes enhance the transcription of Autoimmune Regulator target genes

**Mithu Guha<sup>1\*</sup>, Mario Saare<sup>1\*</sup>, Julia Maslovskaja<sup>1\*</sup>, Kai Kisand<sup>1</sup>, Ingrid Liiv<sup>1</sup>, Uku Haljasorg<sup>1</sup>, Tõnis Tasa<sup>2</sup>, Andres Metspalu<sup>3,4</sup>, Lili Milani<sup>3</sup>, Pärt Peterson<sup>1</sup>**

<sup>1</sup>Molecular Pathology, Institute of Biomedical and Translational Medicine; <sup>2</sup>Institute of Computer Science; <sup>3</sup>Estonian Genome Center, <sup>4</sup>Institute of Molecular and Cell Biology, University of Tartu, Tartu, Estonia

Running title: *AIRE expression and chromatin structure*

\*These authors contributed equally to this work

To whom the correspondence should be addressed: Prof. Pärt Peterson, Molecular Pathology, Institute of Biomedicine and Translational Medicine, University of Tartu, Tartu, 50411, Estonia, telephone: +3727374202, e-mail: [part.peterson@ut.ee](mailto:part.peterson@ut.ee)

**Keywords:** AIRE, DNA topoisomerase, transcription, CTCF, chromatin structure, etoposide, RNA splicing, DNA sequencing, RNA sequencing, DNA breaks

---

**Supplemental Table 1.** List of oligonucleotides used in the study.

| Expression analysis  | Oligo name         | Sequences                     |
|----------------------|--------------------|-------------------------------|
| S100A8               | Hu_S100A8_F        | CTCAGTATATCAGGAAAAAGGGTGCAGAC |
|                      | Hu_S100A8_R        | CACGCCCATCTTTATCACCAGAATGAG   |
| IVL                  | Hu_IVL_F           | GCCTTACTGTGAGTCTGGTTGACA      |
|                      | Hu_IVL_R           | GGAGGAACAGTCTTGAGGAGCT        |
| HBG2                 | Hu_HBG2_F          | CATAAAGCACCTGGATGATCTC        |
|                      | Hu_HBG2_R          | CAGGAGCTTGAAGTTCTCAG          |
| PDYN                 | Hu_PDYN1_F         | TGCCTTTGTTCTATTTTTGCAGGT      |
|                      | Hu_PDYN1_R         | CAGCAATTCCTGCGGCTTG           |
| DMBT1                | Hu_DMBT1_F         | AGAACCCAGCAAAATGGGGA          |
|                      | Hu_DMBT1_R         | TTGGGATCCACCCACCTGTA          |
| KRT73                | Hu_KRT73_F         | GAGTGCAGGATGTCCGGAGAATA       |
|                      | Hu_KRT73_R         | TTGCTGAATCCAAAGCCAGCC         |
| CEACAM5              | Hu_CEA5_F          | CCTGGATGTCCTCTATGGGC          |
|                      | Hu_CEA5_R          | TACTGCGGGGATGGGTTAGA          |
| PSMD4                | Hu_PSMD4_F         | GAAGGTGAAAGAGACTCA            |
|                      | Hu_PSMD4_R         | GTCATACTGCTTAGGTCA            |
| HPRT                 | Hu_HPRT_F          | GACTTTGCTTTCTTGGTCAGG         |
|                      | Hu_HPRT_R          | AGTCTGGCTTATATCCAACACTTCG     |
| <b>ChIP analysis</b> |                    |                               |
| S100A8 promoter      | ch_SA81_F          | TGTGCTGGGTCCCCAATGGC          |
|                      | ch_SA81_R          | GCTGCTTGGGGTCCCTCTGC          |
| S100A8 control       | ch_SA81_con_F      | TGGCTTTGGTCTCGCCGTCTAAGTAA    |
|                      | ch_SA81_con_R      | TGGTGGGTTCAAGGTGCAC1GTAGAT    |
| IVL promoter         | ch_IVL_F           | CCAATCCTTTAGATATGGTACACAG     |
|                      | ch_IVL_R           | TCCCCAGGTCTCTGGTTCTT          |
| IVL control          | ch_IVL_con_F       | TGTTTGTGTTGTGCAAGGCCGAGA      |
|                      | ch_IVL_con_R       | AGGAACATTTTGTGAGGCCAAGGCT     |
| DMBT1 promoter       | ch_DMBT1_F         | AGGTTACCCGAGAGGGAAGT          |
|                      | ch_DMBT1_R         | GAACAATCTGGCTGTTGCC           |
| PSMD4 promoter       | ch_PSMD4_F         | GATAGTCCCGGTTACCAC            |
|                      | ch_PSMD4_R         | TGTAGCTAAAGACAGACCCG          |
| GAPDH promoter       | ch_GAPDH_F         | CCCGTCCTTGACTCCCTAGT          |
|                      | ch_GAPDH_R         | GGGGGAAGGGACTGAGATT           |
| CEACAM CTCF site 9   | ch_CTCF9_F         | GGAGGTGGGTCGAGGTGATC          |
|                      | ch_CTCF9_R         | CAGAGGGCAGCAGAGTCC            |
| CEACAM CTCF site 10  | ch_CTCF10_F        | GGCTGGGATTGTGGCAGTAA          |
|                      | ch_CTCF10_R        | ACTCTCCTGGCCCCTTTTTG          |
| CEACAM CTCF site 11  | ch_CTCF11_F        | CGAGCTGAAACCTGGTAGCA          |
|                      | ch_CTCF11_R        | TGGTGGACAGGAGGGAAGTG          |
| <b>3C analysis</b>   |                    |                               |
| CTCF site 10 forward | 3c_anchor_site10_F | CTCCCCAAGCTCTAACAACCAA        |
| CTCF site 10 reverse | 3c_anchor_site10_R | CTCTTTGCACCTCAGTCCTCTC        |
| CTCF site 1          | 3c_site1_F         | GACTTAGAGGCTTCAGTCATCATCC     |
| CTCF site 2          | 3c_site2_F         | TAAGGAGCAAGGAGACCAGGAG        |
| CTCF site 3          | 3c_site3_F         | CTTCCCTTGGCCATTTCCCA          |
| CTCF site 4          | 3c_site4_F         | CAAATTCCTGCTCAAGCAATC         |
| CTCF site 5          | 3c_site5_F         | GAAATTAGCCTCACTGAGTCACTGT     |
| CTCF site 6          | 3c_site5_R         | GAGCTGGGAAATAACACTCACACTA     |
| CTCF site 7          | 3c_site7_F         | AGTTGGTAGGAGCGACTTTAGAAAT     |
| CTCF site 8          | 3c_site8_F         | CCTATGACCCTTAGCCTCTCTGAG      |
| CTCF site 9          | 3c_site9_F         | AGATTGTGGTCTTATGTCAGGTCAA     |
| CTCF site 11         | 3c_site11_R        | TGGTGGACAGGAGGGAAGTG          |
| CTCF site 12         | 3c_site12_F        | TTTGCTAAGGAAGTGGAGGTGGA       |
| CTCF site 13         | 3c_site13_R        | CTTGTGGAACTCTGAGAACTGCAT      |
| CTCF site 14         | 3c_site14_R        | CGGAGAAGTCTTACAATCTTTAA       |
| CTCF site 15         | 3c_site15_R        | AAAATGAAGCGACTTGCCAGG         |
| CTCF site 16         | 3c_site16_F        | CACATATTCCCAACAACCTCTGCAAG    |
| CTCF site 17         | 3c_site17_F        | TGGAAGTAACTGTCAGAGAGAGCT      |
| CTCF site 18         | 3c_site18_F        | AAAATATAGAAATATGGGGCCGGGC     |
| CTCF site 19         | 3c_site19_F        | CACCTATTCCCAACAACCTGCAAG      |
| CTCF site 20         | 3c_site20_F        | ACAAACAAACTCAGGCTGTAAAGAC     |
| CTCF site 21/22      | 3c_site21/22_F     | GTGCAGCTAGATGGTCAGTCC         |
| CTCF site 23         | 3c_site23_R        | GCCAATTTAGATTTACCTGCCCC       |
| CTCF site 24         | 3c_site24_R        | AGTGTAACAACGGTGCTTTTAACA      |

**A**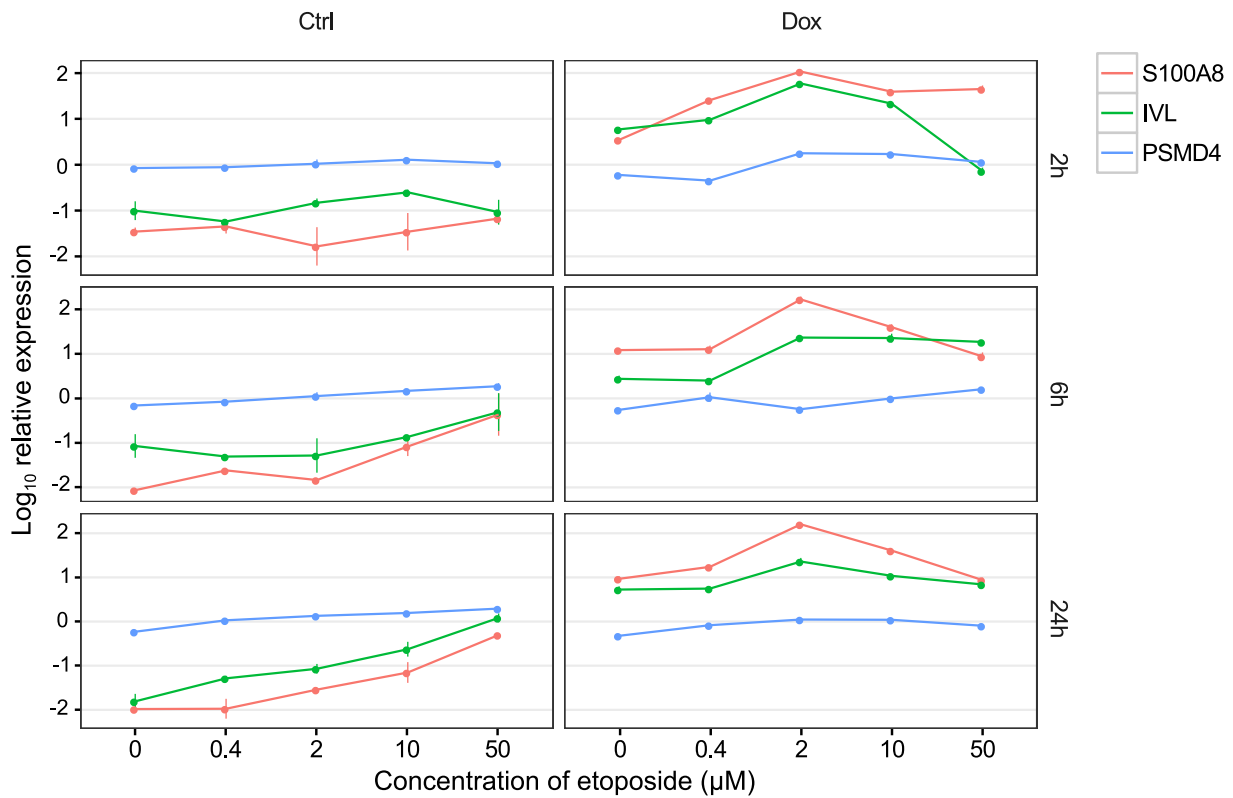**B**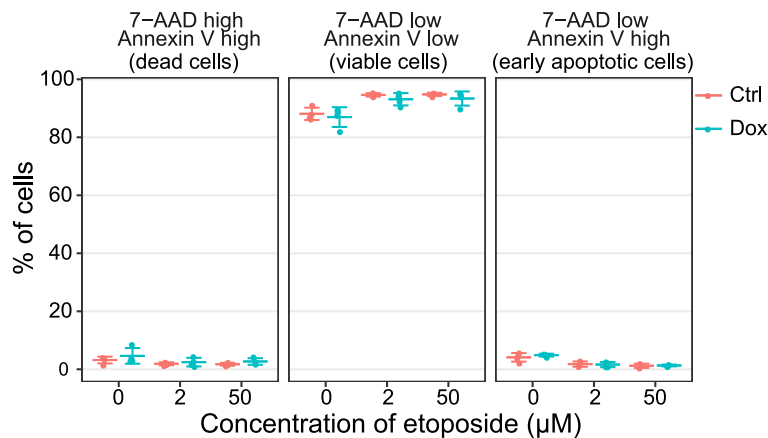

**Supplemental Figure 1.** The effect of etoposide treatment on AIRE target gene expression. A, the expression levels of the AIRE-dependent genes (S100A8 and IVL) and the AIRE-independent PSMD4 gene were analyzed after 2, 6 or 24 h incubation of uninduced (Ctrl) and induced (Dox) Aire-Tet cells with 0.4, 2, 10 and 50 μM etoposide concentrations. Log<sub>10</sub>-transformed data show the mean ± SD of two independent qPCR experiments. B, FACS analysis of apoptosis of uninduced (Ctrl) and induced (Dox) Aire-Tet cells treated with 0, 2 and 50 μM etoposide using FITC-conjugated Annexin V and 7-AAD as markers for early and late apoptosis, respectively. The individual data points together with their mean ± SD are from four independent experiments.

**A**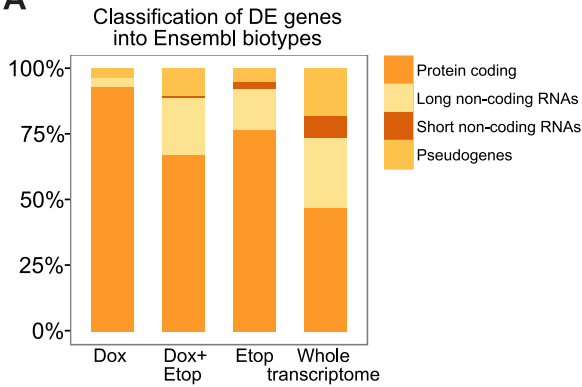**B**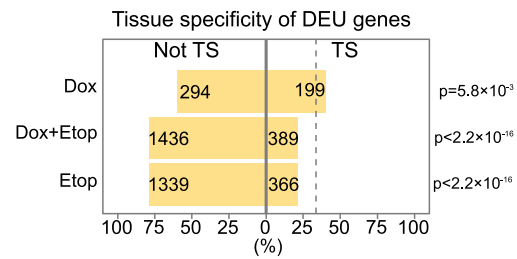

**Supplemental Figure 2.** Features of genes affected by the induction of AIRE, treatment with etoposide or AIRE/etoposide combination in AIRE-Tet cells. A, Differentially expressed genes classified by their biotype derived from Ensembl (release 75) annotations and compared to the whole AIRE-Tet transcriptome. C, Percentage of alternatively spliced genes that are classified as TS or broadly expressed in our experimental conditions. The dashed line marks the percentage of TS genes in the genome (34%), which was compared to the proportions of TS genes in each condition with the  $X^2$ -test.
